# Supplementary material for: Community composition, bacterial symbionts, antibacterial and antioxidant activities of honeybee-associated fungi
Source: BMC Microbiol. 2022 Jun 27;22:168. doi: 10.1186/s12866-022-02580-4 (PMC9235140; doi:10.1186/s12866-022-02580-4)
Supplement: Supplementary file 1 — Additional file 1: Table S1. Taxonomic assignment of the OTUs obtained in the study and their relative abundance at each honeybee gut. [file 12866_2022_2580_MOESM1_ESM.xlsx]

## Sheet: 肠道真菌taxa.table
Table S1: Taxonomic assignment of the OTUs obtained in the study and their relative abundance at each honeybee gut.
MFF1_1	MFF1_2	MFF1_3	OTU ID
0.776432	0.875981	0.72991	d__Eukaryota; k__Fungi; p__Ascomycota; c__Saccharomycetes; o__Saccharomycetales; f__Metschnikowiaceae; g__Kodamaea
0.15201	0.0167446	0.0892445	d__Eukaryota; k__Fungi; p__Ascomycota; c__Saccharomycetes; o__Saccharomycetales; f__Saccharomycetaceae; g__Zygosaccharomyces
0.0353902	0.0291063	0.133257	d__Eukaryota; k__Fungi; p__Basidiomycota; c__Wallemiomycetes; o__Wallemiales; f__Wallemiaceae; g__Wallemia
0.0201105	0.0586062	0.0246852	d__Eukaryota; k__Fungi; p__Ascomycota; c__Saccharomycetes; o__Saccharomycetales; f__Phaffomycetaceae; g__Wickerhamomyces
0.00716206	0.00973192	0.00348032	d__Eukaryota; k__Fungi; p__Ascomycota; c__Saccharomycetes; o__Saccharomycetales; f__Saccharomycetaceae; g__Lachancea
0.00260439	0.0040341	0.00278665	d__Eukaryota; k__Fungi; p__Ascomycota; c__Saccharomycetes; o__Saccharomycetales; f__Saccharomycetales_fam_Incertae_sedis; g__Candida
0.000640595	0.00061719	0.00406635	d__Eukaryota; k__Fungi; p__Ascomycota; c__Eurotiomycetes; o__Onygenales; f__Ascosphaeraceae; g__Ascosphaera
0.000976645	0.00144011	0.000514274	d__Eukaryota; k__Fungi; p__Ascomycota; c__Saccharomycetes; o__Saccharomycetales; f__Trichomonascaceae; g__Zygoascus
0	0.000805031	0.00228433	d__Eukaryota; k__Fungi; p__Ascomycota; c__Dothideomycetes; o__Pleosporales; f__Sporormiaceae; g__Sporormiella
0.000987146	8.05031e-05	0.000717592	d__Eukaryota; k__Fungi; p__Ascomycota; c__Dothideomycetes; o__Capnodiales; f__Cladosporiaceae; g__Cladosporium
5.25078e-05	9.83926e-05	0.00174614	d__Eukaryota; k__Fungi; p__Ascomycota; c__Eurotiomycetes; o__Eurotiales; f__Aspergillaceae; g__Penicillium
0.000661598	0.00020573	0.000729552	d__Eukaryota; k__Fungi; p__Ascomycota; c__Dothideomycetes; o__Capnodiales; f__Teratosphaeriaceae; g__unclassified_f__Teratosphaeriaceae
1.05016e-05	0.000143117	0.00121991	d__Eukaryota; k__Fungi; p__Ascomycota; c__Eurotiomycetes; o__Eurotiales; f__Aspergillaceae; g__Aspergillus
0.000294044	0.000518797	0.000370756	d__Eukaryota; k__Fungi; p__unclassified_k__Fungi; c__unclassified_k__Fungi; o__unclassified_k__Fungi; f__unclassified_k__Fungi; g__unclassified_k__Fungi
0	0	0.00135146	d__Eukaryota; k__Fungi; p__Ascomycota; c__Sordariomycetes; o__Trichosphaeriales; f__Trichosphaeriaceae; g__Nigrospora
9.4514e-05	0.000357791	0.000322916	d__Eukaryota; k__Fungi; p__Ascomycota; c__Saccharomycetes; o__Saccharomycetales; f__Saccharomycetaceae; g__Torulaspora
0.000315047	0.000375681	0	d__Eukaryota; k__Fungi; p__Ascomycota; c__unclassified_p__Ascomycota; o__unclassified_p__Ascomycota; f__unclassified_p__Ascomycota; g__unclassified_p__Ascomycota
0	0	0.00084915	d__Eukaryota; k__Fungi; p__Ascomycota; c__Sordariomycetes; o__Hypocreales; f__Cordycipitaceae; g__Cordyceps
0.000325548	8.94478e-06	0.000155478	d__Eukaryota; k__Fungi; p__Ascomycota; c__Sordariomycetes; o__Hypocreales; f__Hypocreales_fam_Incertae_sedis; g__Ustilaginoidea
0	0.000304123	0	d__Eukaryota; k__Fungi; p__Ascomycota; c__Leotiomycetes; o__Helotiales; f__Helotiales_fam_Incertae_sedis; g__Amphobotrys
0.00033605	0	0	d__Eukaryota; k__Fungi; p__Ascomycota; c__Eurotiomycetes; o__Chaetothyriales; f__Trichomeriaceae; g__unclassified_f__Trichomeriaceae
0.000283542	0	0	d__Eukaryota; k__Fungi; p__Ascomycota; c__Sordariomycetes; o__Sordariales; f__Chaetomiaceae; g__Chaetomium
0.00019953	0	8.3719e-05	d__Eukaryota; k__Fungi; p__Basidiomycota; c__Agaricomycetes; o__Polyporales; f__Ganodermataceae; g__Ganoderma
0	0	0.000298997	d__Eukaryota; k__Fungi; p__Ascomycota; c__Dothideomycetes; o__Capnodiales; f__Capnodiaceae; g__Leptoxyphium
0	0	0.000298997	d__Eukaryota; k__Fungi; p__Basidiomycota; c__Cystobasidiomycetes; o__Cystobasidiales; f__Cystobasidiaceae; g__Cystobasidium
9.4514e-05	8.05031e-05	4.78395e-05	d__Eukaryota; k__Fungi; p__Basidiomycota; c__Tremellomycetes; o__Cystofilobasidiales; f__Cystofilobasidiaceae; g__Cystofilobasidium
0	0.000196785	0	d__Eukaryota; k__Fungi; p__Basidiomycota; c__Microbotryomycetes; o__Sporidiobolales; f__Sporidiobolaceae; g__Rhodotorula
0	0	0.000251157	d__Eukaryota; k__Fungi; p__Ascomycota; c__Sordariomycetes; o__Hypocreales; f__Hypocreales_fam_Incertae_sedis; g__Sarocladium
0	0.000161006	2.39197e-05	d__Eukaryota; k__Fungi; p__Basidiomycota; c__Tremellomycetes; o__Tremellales; f__Bulleribasidiaceae; g__Hannaella
0.000189028	0	0	d__Eukaryota; k__Fungi; p__Ascomycota; c__Saccharomycetes; o__Saccharomycetales; f__Dipodascaceae; g__unclassified_f__Dipodascaceae
0.000105016	0	9.56789e-05	d__Eukaryota; k__Fungi; p__Basidiomycota; c__Agaricomycetes; o__Agaricales; f__Pterulaceae; g__Radulomyces
1.05016e-05	0	0.000191358	d__Eukaryota; k__Fungi; p__Ascomycota; c__Saccharomycetes; o__Saccharomycetales; f__Debaryomycetaceae; g__Priceomyces
0	0	0.000167438	d__Eukaryota; k__Fungi; p__Ascomycota; c__Eurotiomycetes; o__Eurotiales; f__Aspergillaceae; g__Xeromyces
0	0	0.000167438	d__Eukaryota; k__Fungi; p__Ascomycota; c__Sordariomycetes; o__Xylariales; f__Xylariaceae; g__Hypoxylon
0.000147022	0	0	d__Eukaryota; k__Fungi; p__Basidiomycota; c__Tremellomycetes; o__Filobasidiales; f__Filobasidiaceae; g__Naganishia
0.00013652	0	0	d__Eukaryota; k__Fungi; p__Basidiomycota; c__Agaricomycetes; o__Agaricales; f__Psathyrellaceae; g__Psathyrella
0.00013652	0	0	d__Eukaryota; k__Fungi; p__Ascomycota; c__Eurotiomycetes; o__Chaetothyriales; f__Trichomeriaceae; g__Trichomerium
0.000115517	1.78896e-05	0	d__Eukaryota; k__Fungi; p__Ascomycota; c__Saccharomycetes; o__Saccharomycetales; f__Debaryomycetaceae; g__Lodderomyces
0	0	0.000119599	d__Eukaryota; k__Fungi; p__Basidiomycota; c__Agaricomycetes; o__Agaricales; f__Strophariaceae; g__Hypholoma
0	0	0.000107639	d__Eukaryota; k__Fungi; p__Ascomycota; c__Sordariomycetes; o__Hypocreales; f__Bionectriaceae; g__unclassified_f__Bionectriaceae
2.10031e-05	0	8.3719e-05	d__Eukaryota; k__Fungi; p__Basidiomycota; c__Agaricomycetes; o__Agaricales; f__Psathyrellaceae; g__Coprinopsis
0	7.15583e-05	0	d__Eukaryota; k__Fungi; p__Basidiomycota; c__Agaricomycetes; o__Polyporales; f__Ganodermataceae; g__Perenniporia
0	0	9.56789e-05	d__Eukaryota; k__Fungi; p__Ascomycota; c__Eurotiomycetes; o__Eurotiales; f__unclassified_o__Eurotiales; g__unclassified_o__Eurotiales
1.05016e-05	0	7.17592e-05	d__Eukaryota; k__Fungi; p__Ascomycota; c__Saccharomycetes; o__Saccharomycetales; f__Debaryomycetaceae; g__Debaryomyces
0	5.36687e-05	0	d__Eukaryota; k__Fungi; p__Ascomycota; c__Saccharomycetes; o__Saccharomycetales; f__Trigonopsidaceae; g__Trigonopsis
5.25078e-05	0	1.19599e-05	d__Eukaryota; k__Fungi; p__Ascomycota; c__Eurotiomycetes; o__Eurotiales; f__Trichocomaceae; g__Talaromyces
0	0	5.97993e-05	d__Eukaryota; k__Fungi; p__Ascomycota; c__Dothideomycetes; o__Capnodiales; f__Mycosphaerellaceae; g__Pseudocercospora
0	3.57791e-05	0	d__Eukaryota; k__Fungi; p__Ascomycota; c__Leotiomycetes; o__Erysiphales; f__Erysiphaceae; g__Golovinomyces
0	0	4.78395e-05	d__Eukaryota; k__Fungi; p__Basidiomycota; c__Tremellomycetes; o__Tremellales; f__Cryptococcaceae; g__Cryptococcus_f__Cryptococcaceae
0	3.57791e-05	0	d__Eukaryota; k__Fungi; p__Ascomycota; c__Eurotiomycetes; o__Chaetothyriales; f__Herpotrichiellaceae; g__Coniosporium
0	3.57791e-05	0	d__Eukaryota; k__Fungi; p__Ascomycota; c__Saccharomycetes; o__Saccharomycetales; f__Metschnikowiaceae; g__Metschnikowia
0	3.57791e-05	0	d__Eukaryota; k__Fungi; p__Ascomycota; c__Saccharomycetes; o__Saccharomycetales; f__Pichiaceae; g__Pichia
0	3.57791e-05	0	d__Eukaryota; k__Fungi; p__Basidiomycota; c__Agaricomycetes; o__Polyporales; f__Meruliaceae; g__Byssomerulius
4.20062e-05	0	0	d__Eukaryota; k__Fungi; p__Basidiomycota; c__Microbotryomycetes; o__Sporidiobolales; f__Sporidiobolaceae; g__Sporobolomyces
3.15047e-05	0	0	d__Eukaryota; k__Fungi; p__Ascomycota; c__Eurotiomycetes; o__Chaetothyriales; f__Herpotrichiellaceae; g__Exophiala
0	2.68344e-05	0	d__Eukaryota; k__Fungi; p__Basidiomycota; c__Agaricomycetes; o__Agaricales; f__Bolbitiaceae; g__Panaeolus
0	0	3.58796e-05	d__Eukaryota; k__Fungi; p__Basidiomycota; c__Agaricomycetes; o__Russulales; f__Peniophoraceae; g__Peniophora
0	2.68344e-05	0	d__Eukaryota; k__Fungi; p__Basidiomycota; c__Agaricomycetes; o__Polyporales; f__unclassified_o__Polyporales; g__unclassified_o__Polyporales
0	2.68344e-05	0	d__Eukaryota; k__Fungi; p__Basidiomycota; c__Cystobasidiomycetes; o__Erythrobasidiales; f__unclassified_o__Erythrobasidiales; g__unclassified_o__Erythrobasidiales
2.10031e-05	0	0	d__Eukaryota; k__Fungi; p__Ascomycota; c__Eurotiomycetes; o__Chaetothyriales; f__Trichomeriaceae; g__Alatosessilispora
0	0	2.39197e-05	d__Eukaryota; k__Fungi; p__Ascomycota; c__Saccharomycetes; o__Saccharomycetales; f__Saccharomycetaceae; g__Kazachstania
0	0	2.39197e-05	d__Eukaryota; k__Fungi; p__Basidiomycota; c__Agaricomycetes; o__Agaricales; f__Lycoperdaceae; g__Disciseda
